# Supplementary material
Source: PubMed Central journal article supplement (PMC9349724)
Supplement: CPT-112-803-s003.pdf [file CPT-112-803-s003.pdf]

Fig S1

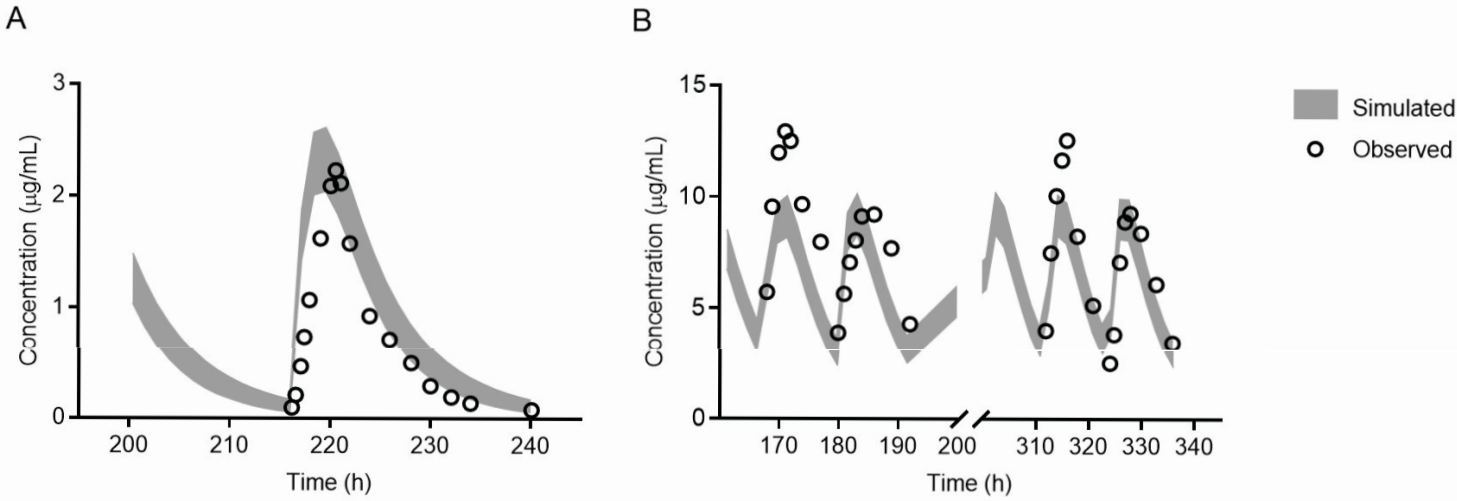

**Figure S1** Simulated versus observed plasma concentration–time profile of ritonavir after multiple oral doses of 200 mg once (A) and 500 mg twice (B) daily, respectively. Grey bars represent simulated 5-95% confidence interval. Circles represent observed mean values. Data are extracted from Mathias, A. *et al.* and Hsu, A. *et al.* in **Table S2**.
